# Supplementary material for: Experimental Study of Water Infiltration in Unsaturated Horizontal Sand Columns under Various Air Confinement Conditions
Source: Hindawi journal article supplement (doi:10.1155/2019/4270358), 2019-12-18
Supplement: f1 [file 4270358.f1.zip]

Archive with 5 entries (5 files):
- Fig. 3.xlsx
- Fig. 4.xlsx
- Fig. 5.xlsx
- Fig. 6.xlsx
- Fig. 7.xlsx
