# Supplementary material for: Experimental Study of Water Infiltration in Unsaturated Horizontal Sand Columns under Various Air Confinement Conditions
Source: Hindawi journal article supplement (doi:10.1155/2019/4270358), 2019-12-18
Supplement: f1 [file 4270358.f1.zip › Fig. 3.xlsx]

## Sheet: Figure 3a
Figure 3a
P1 (30 cm)		P2 (100 cm)		P3 (170 cm)
Time (min)	Water saturation (Sw)	Time (min)	Water saturation (Sw)	Time (min)	Water saturation (Sw)
0	0.32	0	0.321	0	0.321
3	0.321	4	0.32	2	0.323
4	0.382	8	0.323	5	0.32
5	0.841	12	0.319	7	0.32
6	1	16	0.32	10	0.319
12	1.001	20	0.319	13	0.318
16	1	24	0.323	15	0.322
21	0.999	28	0.321	18	0.321
26	0.998	31	0.321	20	0.322
31	1.003	36	0.321	25	0.318
36	0.999	38	0.322	27	0.32
42	1.001	41	0.321	30	0.321
47	1	44	0.322	31	0.318
52	1	50	0.32	35	0.321
57	1.002	51	0.356	38	0.32
62	1.003	52	0.451	40	0.322
68	1.003	53	0.751	43	0.32
73	1	54	0.865	45	0.318
78	1.003	55	0.998	47	0.322
83	1.002	56	0.998	50	0.322
88	1	58	1.003	53	0.319
94	1.003	60	1.003	55	0.323
99	1.002	61	0.999	57	0.318
104	1.003	65	1.002	60	0.323
109	1.001	70	1.002	63	0.319
114	1.003	74	1.001	66	0.321
120	1.001	78	0.998	68	0.319
125	0.998	83	0.998	71	0.319
130	1.003	87	1.002	76	0.318
135	0.998	92	1	79	0.32
140	0.999	96	0.998	81	0.321
146	1.003	100	1	82	0.322
151	1.001	105	0.999	86	0.322
156	1.003	109	1.002	89	0.323
161	1.003	114	1.002	91	0.322
166	0.998	118	1.002	94	0.322
172	0.999	122	0.998	98	0.321
177	1.001	127	0.998	101	0.32
182	1.001	131	1.001	104	0.323
187	1.003	136	0.998	106	0.319
192	1.001	140	0.999	111	0.318
198	1	144	0.999	113	0.319
		149	1.001	116	0.319
		153	0.998	121	0.322
		158	0.998	124	0.32
		162	1.001	125	0.323
		166	0.998	129	0.322
		171	0.999	131	0.319
		175	0.999	134	0.323
		180	1.001	138	0.323
		184	0.998	142	0.321
		188	0.999	144	0.322
		193	1.003	145	0.336
		197	0.998	146	0.352
				147	0.379
				148	0.401
				149	0.432
				150	0.485
				151	0.535
				152	0.626
				153	0.758
				156	0.851
				157	1
				158	1.001
				159	0.998
				160	0.998
				165	1.001
				174	0.998
				181	0.998
				188	1.003
				195	0.998
--	--
--	--
--	--
--	--
--	--
--	--
--	--

## Sheet: Figure 3b
Figure 3b
P1 (30 cm)		P2 (100 cm)		P3 (170 cm)
Time (min)	Water saturation (Sw)	Time (min)	Water saturation (Sw)	Time (min)	Water saturation (Sw)
0	0.319	0	0.32	0	0.32
5	0.32	17	0.321	17	0.319
6	0.753	36	0.319	35	0.319
7	0.865	50	0.322	53	0.323
8	0.999	51	0.442	71	0.319
32	1.001	52	0.544	90	0.319
40	1.003	53	0.692	108	0.321
51	1.003	54	0.788	126	0.322
36	0.999	55	0.855	143	0.318
38	0.999	56	0.997	162	0.319
39	1	57	1	169	0.322
41	0.999	80	0.999	181	0.321
42	1.001	100	0.999	197	0.32
43	1	130	1.002	217	0.319
70	1.003	170	1.002	235	0.318
97	1.003	186	1.002	253	0.323
123	1.001	197	0.998	280	0.323
150	1	204	1.002	294	0.321
176	1.003	227	0.998	308	0.321
203	1.003	251	1	326	0.32
230	1.001	275	1.002	337	0.323
256	1.002	300	1	363	0.321
283	0.999	324	0.998	381	0.321
309	1.001	348	0.993	395	0.322
336	1.003	372	0.995	417	0.322
363	0.999	396	1.002	435	0.32
389	1.001	420	0.995	462	0.321
416	1.003	444	1	490	0.321
442	1	469	1.002	500	0.319
469	1	493	0.998	508	0.323
496	1.001	517	1.002	525	0.318
522	1.002	541	0.993	545	0.319
549	0.998	565	1	560	0.321
575	0.998	589	0.998	581	0.323
602	1.002	613	0.995	599	0.318
629	1	638	1.005	617	0.318
655	0.999	662	0.993	636	0.319
682	1.003	686	1.007	654	0.32
708	0.998	710	1.007	672	0.318
735	1	734	1.007	690	0.32
762	0.999	758	1.002	709	0.32
788	0.998	782	0.995	710	0.341
815	1	807	1	711	0.354
841	0.999	831	0.993	713	0.371
868	1.003	855	1.007	714	0.391
895	1.002	879	0.998	715	0.425
		903	1.005	717	0.448
				718	0.482
				720	0.535
				721	0.562
				722	0.592
				724	0.622
				725	0.667
				727	0.699
				728	0.717
				729	0.732
				731	0.752
				734	0.776
				735	0.793
				736	0.821
				745	0.856
				746	0.866
				781	0.998
				790	1
				795	1
				799	1.002
				815	0.998
				830	1
				846	1
				861	1.001
				876	1
				892	1.005

## Sheet: Figure 3c
Figure 3c
P1 (30 cm)		P2 (100 cm)		P3 (170 cm)
Time (min)	Water saturation (Sw)	Time (min)	Water saturation (Sw)	Time (min)	Water saturation (Sw)
0	0.32	0	0.32	0	0.319
5	0.32	32	0.321	24	0.321
6	0.375	66	0.322	48	0.322
7	0.835	96	0.321	72	0.321
8	1	133	0.319	98	0.321
30	1	176	0.322	120	0.318
88	1	200	0.32	147	0.321
120	1.001	234	0.32	174	0.321
147	1	267	0.32	197	0.321
221	1	278	0.32	221	0.321
304	1	300	0.321	246	0.32
395	1	301	0.352	272	0.32
483	1.002	302	0.433	304	0.318
568	1	303	0.494	344	0.318
643	1.002	304	0.554	368	0.322
720	1.005	306	0.628	395	0.32
808	1	307	0.693	424	0.32
891	1	309	0.711	445	0.32
960	1	310	0.742	483	0.322
1032	0.999	311	0.755	510	0.321
1104	0.998	312	0.766	544	0.32
1184	1.003	314	0.796	568	0.321
1264	1.001	315	0.832	594	0.32
1350	1.003	317	0.968	635	0.318
1424	1	322	0.998	643	0.318
1504	0.999	326	1	667	0.319
1576	0.998	331	1	693	0.318
1654	1.002	339	1	720	0.318
1734	1.002	346	0.998	752	0.319
1754	1	352	1.001	781	0.318
1768	0.999	483	1	808	0.319
1776	1	549	1	832	0.322
1782	0.999	614	1	872	0.319
1794	0.999	680	0.999	891	0.319
1800	0.999	746	0.999	912	0.321
1814	1.002	811	1	936	0.319
1821	0.998	877	1	960	0.321
1829	1.002	942	1	984	0.32
1853	0.999	1008	1.001	1008	0.319
1870	0.998	1074	1.002	1032	0.321
1910	1.002	1139	1	1056	0.321
1949	0.999	1205	1.001	1083	0.323
1994	1.002	1270	1	1104	0.318
2056	1.003	1336	1	1130	0.319
2117	0.998	1402	0.998	1155	0.319
2235	1	1467	1	1184	0.321
2336	0.998	1533	1	1229	0.321
		1598	0.999	1237	0.319
		1664	1	1264	0.319
		1730	0.998	1296	0.318
		1795	1	1322	0.319
		1861	1	1350	0.322
		1926	0.999	1376	0.319
		1992	1	1400	0.319
		2058	1	1424	0.321
		2123	1.001	1456	0.319
		2189	1.001	1480	0.321
		2254	0.999	1504	0.32
		2320	1	1525	0.319
		2386	1	1549	0.321
				1576	0.321
				1600	0.323
				1629	0.318
				1654	0.319
				1680	0.319
				1709	0.321
				1734	0.321
				1749	0.321
				1768	0.32
				1778	0.319
				1790	0.32
				1800	0.322
				1803	0.342
				1810	0.379
				1814	0.412
				1818	0.453
				1819	0.483
				1821	0.521
				1824	0.572
				1827	0.612
				1829	0.641
				1835	0.692
				1845	0.742
				1853	0.787
				1859	0.811
				1864	0.828
				1870	0.851
				1880	0.882
				1898	0.998
				1910	1
				1926	1
				1936	1.002
				1949	0.998
				1971	1
				1982	0.998
				1994	1.002
				2008	1.003
				2018	1.001
				2056	1.001
				2083	1
				2094	1.003
				2117	1
				2168	1.003
				2202	0.999
				2235	1
				2269	1.003
				2302	1
				2336	1.002
				2370	1
