# Supplementary material for: Experimental Study of Water Infiltration in Unsaturated Horizontal Sand Columns under Various Air Confinement Conditions
Source: Hindawi journal article supplement (doi:10.1155/2019/4270358), 2019-12-18
Supplement: f1 [file 4270358.f1.zip › Fig. 4.xlsx]

## Sheet: Expt. #2(a)
Full				Part
The column end				The column end
t (min)	Air pressure (kPa)			t (min)	Air pressure (kPa)
1	0			1	0
9	0			3	0
17	0			5	0
25	0			8	0
33	0			11	0
41	0			14	0
49	0			17	0
57	0			20	0
65	0			23	0
73	0			26	0
74	0.063			29	0
75	1.695			32	0
76	3.215			35	0
77	4.639			38	0
78	6.012			41	0
79	7.324			44	0
80	8.566			47	0
81	9.752			50	0
82	10.872			53	0
83	11.93			56	0
84	12.927			59	0
85	13.864			62	0
86	14.747			65	0
87	15.574			68	0
88	16.344			71	0
89	17.076			74	0
90	17.751			75	0.063
91	18.38			76	1.695
92	18.973			77	3.201
93	19.512			78	4.639
94	19.99			79	6.012
95	20.45			80	7.324
96	20.868			81	8.566
97	21.285			82	9.752
98	21.673			83	10.872
99	22.031			84	11.93
100	22.366			85	12.927
101	22.673			86	13.864
102	22.953			87	14.747
103	23.203			88	15.574
104	23.437			89	16.344
105	23.659			90	17.076
106	23.869			91	17.751
107	23.944			92	18.38
108	23.831			93	18.973
109	22.527			94	19.512
110	22.965			95	19.99
111	22.522			96	20.45
112	22.167			97	20.868
113	22.147			98	21.285
114	22.705			99	21.673
115	23.301			100	22.031
116	23.556			101	22.366
117	23.794			102	22.673
118	23.898			104	23.203
123	24.108			106	23.659
127	24.24			108	23.944
131	24.41			109	23.831
135	24.546			110	22.527
139	24.665			111	22.965
144	24.775			112	22.522
150	24.855			113	22.167
155	24.914			114	22.147
161	24.989			115	22.705
166	25.041			116	23.301
172	25.076			118	23.794
179	25.114			120	23.959
187	25.163			123	24.067
196	25.204			126	24.174
204	25.245			129	24.277
216	25.298			132	24.41
226	25.342			135	24.507
236	25.393			138	24.605
244	25.425			141	24.687
252	25.466			144	24.753
260	25.469			147	24.8
268	25.466			150	24.845
276	25.464			153	24.882
284	25.465			156	24.914
292	25.471			159	24.95
300	25.488			162	24.989
307	25.519			165	25.021
317	25.558			168	25.049
327	25.602			171	25.062
337	25.649			174	25.08
347	25.669			177	25.101
357	25.686			180	25.114
367	25.71			183	25.136
377	25.73			186	25.15
387	25.744			189	25.166
397	25.757			192	25.181
407	25.771			195	25.195
417	25.78			198	25.212
427	25.8			201	25.228
437	25.807			204	25.237
447	25.822			207	25.252
457	25.835			211	25.268
467	25.841			215	25.289
477	25.852			219	25.308
487	25.858			223	25.324
497	25.866			227	25.342
507	25.867			231	25.367
517	25.877			235	25.381
527	25.886			239	25.404
537	25.895			243	25.422
547	25.901			245	25.425
557	25.903
567	25.913
577	25.915
587	25.917
597	25.921
602	25.928
610	25.965
615	25.938
625	25.998
635	25.945
640	25.986
646	25.998
655	25.952
665	25.998
675	25.962
685	25.938
695	25.964
705	25.992
715	25.969
725	25.923
735	25.976
745	25.99
755	25.985
760	26.002
769	26.003
775	25.995
785	26.021
795	26.001
805	26.005
815	26.009
825	26.012
835	26.01
845	26.018
855	26.012
865	26.015
875	26.018
880	26.02
888	26.025
895	26.022
905	26.025

## Sheet: Expt. #3(b)
Full				Part
The column end				The column end
t (min)	Air pressure (kPa)			t (min)	Air pressure (kPa)
1	0			1	0
2	0			3	0
3	0			5	0
4	0			7	0
5	0			9	0
6	0			11	0
7	0			13	0
8	0			15	0
9	0			16	0.014
10	0			17	1.348
11	0			18	2.763
12	0			19	4.103
13	0			20	5.373
14	0			21	6.577
15	0			22	7.719
16	0.014			23	8.804
17	1.348			24	9.833
18	2.763			25	10.811
19	4.103			26	11.738
20	5.373			27	12.619
21	6.577			28	13.455
22	7.719			29	14.248
23	8.804			30	15.001
24	9.833			31	15.715
25	10.811			32	16.39
26	11.738			33	17.032
27	12.619			34	17.64
28	13.455			35	18.216
29	14.248			36	18.76
30	15.001			37	19.275
31	15.715			38	19.766
32	16.39			39	20.228
33	17.032			40	20.664
34	17.64			41	21.078
35	18.216			42	21.47
36	18.76			43	21.84
37	19.275			44	22.191
38	19.766			45	22.522
39	20.228			46	22.828
40	20.664			47	23.123
41	21.078			48	23.397
42	21.47			49	23.656
43	21.84			51	24.115
44	22.191			52	24.341
45	22.522			54	24.752
46	22.828			56	25.124
47	23.123			58	25.455
48	23.397			60	25.733
49	23.656			62	25.984
51	24.115			64	26.175
53	24.555			66	26.362
55	24.942			68	26.547
57	25.295			70	26.714
59	25.601			72	26.857
63	26.081			74	26.986
67	26.455			76	27.082
71	26.79			78	27.177
79	27.224			80	27.27
83	27.393			82	27.355
98	27.746			84	27.43
101	27.784			86	27.496
102	27.221			88	27.551
104	26.304			90	27.598
108	26.617			92	27.638
113	26.852			94	27.678
119	26.977			96	27.714
130	27.112			98	27.746
160	27.242			101	27.784
183	27.45			102	27.221
204	27.508			103	26.618
230	27.55			104	26.304
256	27.578			106	26.368
280	27.603			108	26.617
299	27.636			109	26.504
324	27.682			111	26.803
349	27.725			112	26.728
379	27.742			114	26.877
399	27.754			116	26.62
424	27.768			118	26.961
449	27.783			120	26.79
474	27.807			122	27.017
499	27.811			124	27.044
529	27.804			126	26.87
554	27.818			128	27.092
579	27.822			130	27.112
607	27.834			132	27.033
627	27.842			134	27.153
647	27.835			136	27.074
667	27.841			138	27.194
687	27.841			140	27.215
707	27.851			142	27.235
727	27.864			144	27.247
747	27.869			146	27.259
767	27.871			148	27.272
787	27.871			150	27.284
807	27.877			152	27.296
827	27.892			154	27.309
847	27.876			156	27.321
867	27.884			158	27.332
887	27.902			160	27.242
907	27.901			162	27.351
927	27.898			164	27.361
947	27.916			166	27.37
967	27.905
987	27.908
1007	27.913
1027	27.916
1047	27.916
1067	27.927
1087	27.931
1107	27.936
1127	27.929
1147	27.947
1167	27.951
1187	27.947
1207	27.938
1227	27.947
1247	27.945
1267	27.955
1287	27.949
1307	27.962
1327	27.966
1347	27.962
1367	27.955
1387	27.961
1407	27.968
1427	27.953
1447	27.961
1467	27.972
1487	27.956
1507	27.971
1527	27.961
1547	27.97
1567	27.963
1587	27.972
1607	27.982
1627	27.975
1647	27.977
1667	27.981
1687	27.973
1707	27.972
1727	27.985
1747	27.98
1767	27.971
1787	27.983
1807	27.989
1827	27.99
1847	27.995
1867	27.975
1887	27.995
1907	27.99
1927	27.987
1947	27.98
1967	27.991
1987	27.995
2007	27.985
2027	27.997
2047	27.99
2067	27.999
2087	27.996
2107	28.003
2127	27.992
2147	28.006
2167	27.995
2187	27.999
2207	28.001
2227	28.005
2247	28.002
2267	27.992
2287	27.997
2307	27.995
2327	28.014
2347	28.005
2367	28.004
2387	28.015
2407	27.999
2427	28.01
2447	28.008
2467	28.015
2487	28.019
2507	28.001
2527	28.016
2547	28.013
2567	28.008
2587	28.011
