# Supplementary material for: Experimental Study of Water Infiltration in Unsaturated Horizontal Sand Columns under Various Air Confinement Conditions
Source: Hindawi journal article supplement (doi:10.1155/2019/4270358), 2019-12-18
Supplement: f1 [file 4270358.f1.zip › Fig. 5.xlsx]

## Sheet: Expt. #1(a)
t (min)	Q (cm3)
0	0
1	12.848
2	24.512
3	35.425
4	44.624
5	52.541
6	59.498
7	65.94
8	71.905
9	77.47
10	82.734
11	87.729
12	92.511
13	97.071
14	101.505
15	105.782
16	109.9
17	113.85
18	117.706
19	121.478
20	125.119
21	128.719
22	132.164
23	135.578
24	138.935
25	142.153
26	145.316
27	148.462
28	151.561
29	154.588
30	157.505
31	160.414
32	163.274
33	166.068
34	168.853
35	171.589
36	174.312
37	176.925
38	179.556
39	182.141
40	184.643
41	187.131
42	189.582
43	192.051
44	194.453
45	196.847
46	199.192
47	201.553
48	203.885
49	206.182
50	208.421
51	210.634
52	212.817
53	215.027
54	217.212
55	219.341
56	221.511
57	223.616
58	225.691
59	227.753
60	229.838
61	231.874
62	233.885
63	235.943
64	237.903
65	239.852
66	241.86
67	243.851
68	245.792
69	247.751
70	249.639
71	251.524
72	253.357
73	255.258
74	257.139
75	259.017
76	260.842
77	262.615
78	264.375
79	266.223
80	267.996
81	269.726
82	271.473
83	273.243
84	274.934
85	276.67
86	278.408
87	280.118
88	281.838
89	283.502
90	285.178
91	286.862
92	288.528
93	290.122
94	291.799
95	293.435
96	295.046
97	296.655
98	298.283
99	299.891
100	301.488
101	303.037
103	306.172
105	309.308
107	312.421
109	315.509
111	318.508
113	321.567
115	324.582
117	327.534
119	330.435
121	333.315
123	336.155
125	339.055
127	341.879
129	344.718
131	347.524
133	350.257
135	353.029
137	355.8
139	358.487
141	361.153
143	363.846
145	366.499
147	369.13
149	371.774
151	374.334
153	376.952
155	379.549
157	380.871
159	382.424
161	384.927
163	386.465
165	387.941
167	389.185
169	391.125
171	392.044
173	392.044

## Sheet: Expt. #2(b)
t (min)	Q (cm3)
0	0
1	15.95
2	28.557
3	39.169
4	47.761
5	55.138
6	61.309
7	68.084
8	73.852
9	79.245
10	84.057
11	88.928
12	93.547
13	97.958
14	102.205
15	106.292
16	110.072
17	113.878
18	117.55
19	121.167
20	124.624
21	128.053
22	131.464
23	134.791
24	138.039
25	141.245
26	144.442
27	147.552
28	150.623
29	153.66
30	156.674
31	159.622
32	162.573
33	165.476
34	168.341
35	171.187
36	173.99
37	176.782
38	179.551
39	182.242
40	185.593
41	188.259
42	190.893
43	193.505
44	196.119
45	198.68
46	201.209
47	203.736
48	206.222
49	208.703
50	211.182
51	213.625
52	216.067
53	218.467
54	220.858
55	223.232
56	225.594
57	227.984
58	230.319
59	232.628
60	234.948
61	237.273
62	239.539
63	241.792
64	244.062
65	246.148
66	248.165
67	250.156
68	252.13
69	254.084
70	256.068
71	258.051
72	259.885
73	261.731
74	261.882
75	263.385
76	264.575
77	265.584
78	266.617
79	267.415
80	268.182
81	269.043
82	269.705
83	270.389
84	271.01
85	271.703
86	272.274
87	272.859
88	273.489
89	274.068
90	274.475
91	275.046
92	275.594
94	276.52
96	277.452
98	278.449
100	279.314
103	280.454
105	281.244
107	281.981
111	283.299
114	284.459
116	285.149
118	285.861
120	286.525
124	287.657
127	288.662
129	289.267
131	289.878
133	290.485
137	291.478
140	292.424
151	295.463
162	298.333
170	300.371
175	301.647
181	302.862
186	304.006
192	305.134
197	306.235
203	307.382
208	308.476
214	309.53
219	310.555
225	311.638
230	312.631
236	313.622
241	314.628
247	315.583
252	316.585
258	317.555
263	318.495
269	319.392
274	320.272
279	321.105
285	322.022
290	322.808
296	323.639
301	324.418
307	325.238
312	326.01
321	327.108
329	328.274
337	329.441
345	330.575
353	331.646
362	332.664
370	333.649
375	334.451
386	335.727
397	337.1
408	338.385
419	339.665
430	340.908
441	342.177
452	343.357
463	344.568
474	345.744
485	346.915
496	348.014
507	349.045
518	350.152
529	351.12
542	352.332
553	353.375
564	354.271
575	355.152
586	356.116
603	357.277
619	358.397
641	359.761
660	360.934
685	362.107
723	363.367
753	364.319
795	365.494
863	366.515

## Sheet: Expt. #3(b)
t (min)	Q (cm3)
0	0
1	12.105
2	23.247
3	35.141
4	44.525
5	52.405
6	59.576
7	66.096
8	72.122
9	77.735
10	83.045
11	88.073
12	92.896
13	97.489
14	101.944
15	106.239
16	110.363
17	114.35
18	118.244
19	121.982
20	124.12
21	124.93
22	126.534
23	127.985
24	129.233
25	130.37
26	131.367
27	132.306
28	133.173
29	133.987
30	134.774
31	135.485
32	136.2
34	137.591
36	138.877
38	140.128
40	141.348
42	142.483
46	144.597
51	146.923
56	149.081
61	151.082
66	152.99
71	154.792
76	156.509
93	162.055
97	163.361
102	164.582
104	165.201
109	166.406
113	167.534
115	168.124
120	169.21
124	170.221
129	171.268
133	172.278
137	173.225
140	173.699
142	174.155
146	175.068
153	176.41
157	177.272
162	178.101
169	179.379
173	180.239
177	181.054
184	182.3
189	183.064
195	184.254
200	185.044
206	186.184
213	187.287
217	188.047
224	189.117
231	190.192
237	191.221
244	192.232
251	193.208
257	194.273
264	195.264
271	196.229
277	197.188
284	198.1
291	199.012
300	200.225
306	201.095
315	202.286
322	203.11
331	204.271
337	205.072
346	206.105
355	207.129
364	208.189
371	209.04
382	210.25
389	211.008
397	212.009
406	213.022
417	214.212
424	215.009
435	216.159
444	217.153
453	218.043
464	219.094
475	220.183
484	221.003
495	222.122
506	223.193
515	224.062
526	225.157
535	226.024
546	227.013
560	228.2
569	229.049
584	230.451
595	231.524
601	232.071
612	233.126
623	234.094
634	235.161
645	236.138
656	237.132
667	238.135
679	239.135
690	240.086
701	241.074
717	242.48
729	243.372
740	244.231
751	245.189
762	246.07
779	247.353
790	248.217
801	249.102
812	250.011
829	251.202
840	252.131
856	253.33
867	254.098
879	255.007
895	256.293
906	257.08
923	258.21
934	259.004
951	260.221
962	261.067
979	262.177
995	263.324
1006	264.002
1023	265.173
1040	266.282
1051	267.04
1067	268.095
1084	269.158
1101	270.236
1117	271.336
1129	272.012
1137	272.644
1154	273.754
1171	274.817
1187	275.831
1204	276.949
1221	277.958
1237	279.005
1254	280.043
1271	281.124
1287	282.055
1304	283.081
1321	284.09
1337	285.124
1354	286.037
1371	286.939
1387	287.973
1404	288.912
1421	289.855
1437	290.777
1454	291.693
1471	292.496
1487	293.392
1504	294.385
1521	295.194
1537	296.019
1554	296.925
1571	297.73
1587	298.526
1604	299.325
1621	300.152
1654	301.688
1671	302.403
1704	303.927
1737	305.232
1771	306.522
1804	307.849
1837	309.016
1871	310.116
1904	311.249
1937	312.138
1971	313.097
2021	314.33
2071	315.484
2137	316.608
2221	318.309
2300	319.08
