# Supplementary material for: Experimental Study of Water Infiltration in Unsaturated Horizontal Sand Columns under Various Air Confinement Conditions
Source: Hindawi journal article supplement (doi:10.1155/2019/4270358), 2019-12-18
Supplement: f1 [file 4270358.f1.zip › Fig. 6.xlsx]

## Sheet: Expts. #2 and #5
Expt. #2					Expt. #5
Full		Part			Full		Part
t (min)	Air pressure (kPa)	t (min)	Air pressure (kPa)		t (min)	Air pressure (kPa)	t (min)	Air pressure (kPa)
1	0	1	0		1	0	1	0
9	0	3	0		9	0	3	0
17	0	5	0		17	0	5	0
25	0	8	0		25	0	8	0
33	0	11	0		33	0	11	0
41	0	14	0		41	0	14	0
49	0	17	0		49	0	17	0
57	0	20	0		57	0	20	0
65	0	23	0		65	0	23	0
73	0	26	0		75	0	26	0
74	0.063	29	0		76	0.021	29	0
75	1.695	32	0		77	1.518	32	0
76	3.215	35	0		78	2.963	35	0
77	4.639	38	0		79	4.342	38	0
78	6.012	41	0		80	5.655	41	0
79	7.324	44	0		81	6.906	44	0
80	8.566	47	0		82	8.093	47	0
81	9.752	50	0		83	9.216	50	0
82	10.872	53	0		84	10.279	53	0
83	11.93	56	0		85	11.282	56	0
84	12.927	59	0		86	12.222	59	0
85	13.864	62	0		87	13.104	62	0
86	14.747	65	0		88	13.933	65	0
87	15.574	68	0		89	14.711	68	0
88	16.344	71	0		90	15.439	71	0
89	17.076	74	0		91	16.119	74	0
90	17.751	75	0.063		92	16.738	76	0.021
91	18.38	76	1.695		93	17.316	77	1.518
92	18.973	77	3.201		94	17.864	78	2.963
93	19.512	78	4.639		95	18.368	79	4.342
94	19.99	79	6.012		96	18.802	80	5.655
95	20.45	80	7.324		97	19.236	81	6.906
96	20.868	81	8.566		98	19.656	82	8.093
97	21.285	82	9.752		99	20.042	83	9.216
98	21.673	83	10.872		100	20.4	84	10.279
99	22.031	84	11.93		101	20.733	85	11.282
100	22.366	85	12.927		102	21.039	86	12.222
101	22.673	86	13.864		103	21.314	87	13.104
102	22.953	87	14.747		104	21.557	88	13.933
103	23.203	88	15.574		105	21.784	89	14.711
104	23.437	89	16.344		106	21.999	90	15.439
105	23.659	90	17.076		107	22.19	91	16.119
106	23.869	91	17.751		108	22.376	92	16.738
107	23.944	92	18.38		109	22.515	93	17.316
108	23.831	93	18.973		111	22.793	94	17.864
109	22.527	94	19.512		113	23.049	95	18.368
110	22.965	95	19.99		114	23.15	96	18.802
111	22.522	96	20.45		116	23.351	97	19.236
112	22.167	97	20.868		118	23.522	98	19.656
113	22.147	98	21.285		120	23.666	99	20.042
114	22.705	99	21.673		121	23.739	100	20.4
115	23.301	100	22.031		122	22.727	102	21.039
116	23.556	101	22.366		123	21.213	104	21.557
117	23.794	102	22.673		124	20.277	106	21.999
118	23.898	104	23.203		125	20.448	108	22.376
123	24.108	106	23.659		126	21.186	110	22.654
127	24.24	108	23.944		127	21.899	112	22.932
131	24.41	109	23.831		128	22.226	114	23.15
135	24.546	110	22.527		134	22.332	116	23.351
139	24.665	111	22.965		137	22.588	118	23.522
144	24.775	112	22.522		143	22.706	121	23.739
150	24.855	113	22.167		149	22.946	122	22.727
155	24.914	114	22.147		155	23.077	123	21.213
161	24.989	115	22.705		161	23.181	124	20.277
166	25.041	116	23.301		168	23.279	125	20.448
172	25.076	118	23.794		175	23.34	126	21.186
179	25.114	120	23.959		181	23.393	127	21.899
187	25.163	123	24.067		188	23.445	129	22.31
196	25.204	126	24.174		194	23.488	132	22.178
204	25.245	129	24.277		201	23.527	135	22.464
216	25.298	132	24.41		208	23.572	136	22.597
226	25.342	135	24.507		215	23.625	139	22.514
236	25.393	138	24.605		223	23.666	141	22.581
244	25.425	141	24.687		233	23.718	143	22.706
252	25.466	144	24.753		243	23.754	145	22.802
260	25.469	147	24.8		253	23.79	147	22.886
268	25.466	150	24.845		263	23.814	149	22.946
276	25.464	153	24.882		271	23.838	151	23.002
284	25.465	156	24.914		279	23.863	154	23.059
292	25.471	159	24.95		287	23.877	157	23.113
300	25.488	162	24.989		295	23.895	160	23.165
307	25.519	165	25.021		303	23.914	162	23.196
317	25.558	168	25.049		311	23.922	164	23.227
327	25.602	171	25.062		317	23.941	166	23.258
337	25.649	174	25.08		325	23.956	168	23.279
347	25.669	177	25.101		335	23.964	172	23.299
357	25.686	180	25.114		345	23.983	175	23.34
367	25.71	183	25.136		355	24.001	178	23.388
377	25.73	186	25.15		365	24.009	181	23.393
387	25.744	189	25.166		375	24.029	185	23.441
397	25.757	192	25.181		385	24.03	188	23.445
407	25.771	195	25.195		395	24.035	192	23.475
417	25.78	198	25.212		405	24.06	194	23.488
427	25.8	201	25.228		415	24.052	196	23.501
437	25.807	204	25.237		425	24.069	199	23.502
447	25.822	207	25.252		435	24.087	201	23.527
457	25.835	211	25.268		445	24.09	205	23.558
467	25.841	215	25.289		455	24.1	208	23.572
477	25.852	219	25.308		465	24.103	211	23.599
487	25.858	223	25.324		475	24.111	215	23.625
497	25.866	227	25.342		485	24.117	218	23.675
507	25.867	231	25.367		495	24.134	220	23.681
517	25.877	235	25.381		505	24.147	223	23.666
527	25.886	239	25.404		515	24.142	225	23.675
537	25.895	243	25.422		525	24.144	228	23.688
547	25.901	245	25.425		535	24.153	230	23.702
557	25.903				545	24.161	233	23.718
567	25.913				555	24.172	235	23.722
577	25.915				565	24.164	238	23.733
587	25.917				575	24.17	240	23.74
597	25.921				585	24.18	243	23.754
602	25.928				595	24.195	246	23.771
610	25.965				605	24.188	248	23.778
615	25.938				615	24.201	250	23.789
625	25.998				621	24.21	253	23.79
635	25.945				628	24.216
640	25.986				636	24.212
646	25.998				648	24.208
655	25.952				656	24.225
665	25.998				668	24.226
675	25.962				676	24.234
685	25.938				688	24.239
695	25.964				696	24.237
705	25.992				708	24.248
715	25.969				716	24.25
725	25.923				728	24.247
735	25.976				736	24.264
745	25.99				748	24.258
755	25.985				756	24.268
760	26.002				768	24.279
769	26.003				776	24.27
775	25.995				788	24.286
785	26.021				796	24.289
795	26.001				808	24.278
805	26.005				816	24.3
815	26.009				828	24.291
825	26.012				836	24.299
835	26.01				848	24.299
845	26.018				856	24.301
855	26.012				868	24.318
865	26.015				876	24.312
875	26.018				888	24.321
880	26.02				896	24.316
888	26.025				908	24.325
895	26.022
905	26.025
