# Supplementary material for: Experimental Study of Water Infiltration in Unsaturated Horizontal Sand Columns under Various Air Confinement Conditions
Source: Hindawi journal article supplement (doi:10.1155/2019/4270358), 2019-12-18
Supplement: f1 [file 4270358.f1.zip › Fig. 7.xlsx]

## Sheet: Figure 7a
Figure 7a
Expt. #1			Expt. #4
Time (min)	Cumulative water imbibed (cm3)		Time (min)	Cumulative water imbibed (cm3)
0	0		0	0
1	12.848		1	12.65
2	24.512		2	24.366
3	35.425		3	35.951
4	44.624		4	45.266
5	52.541		5	53.094
6	59.498		6	60.316
7	65.94		7	66.81
8	71.905		8	72.874
9	77.47		9	78.548
10	82.734		10	83.891
11	87.729		11	89.004
12	92.511		12	93.857
13	97.071		13	98.512
14	101.505		14	103.013
15	105.782		15	107.327
16	109.9		16	111.492
17	113.85		17	115.528
18	117.706		18	119.439
19	121.478		19	123.255
20	125.119		20	126.912
21	128.719		21	130.471
22	132.164		22	133.919
23	135.578		23	137.339
24	138.935		24	140.648
25	142.153		25	143.904
26	145.316		26	147.099
27	148.462		27	150.216
28	151.561		28	153.312
29	154.588		29	156.337
30	157.505		30	159.307
31	160.414		31	162.26
32	163.274		32	165.157
33	166.068		33	167.99
34	168.853		34	170.811
35	171.589		35	173.608
36	174.312		36	176.354
37	176.925		37	179.06
38	179.556		38	181.755
39	182.141		39	184.384
40	184.643		40	186.962
41	187.131		41	189.571
42	189.582		42	192.105
43	192.051		43	194.641
44	194.453		44	197.14
45	196.847		45	199.604
46	199.192		46	202.057
47	201.553		47	204.49
48	203.885		48	206.866
49	206.182		49	209.235
50	208.421		50	211.609
51	210.634		51	213.956
52	212.817		52	216.262
53	215.027		53	218.541
54	217.212		54	220.797
55	219.341		55	223.058
56	221.511		56	225.317
57	223.616		57	227.519
58	225.691		58	229.727
59	227.753		59	231.904
60	229.838		60	234.06
61	231.874		61	236.199
62	233.885		62	238.357
63	235.943		63	240.482
64	237.903		64	242.611
65	239.852		65	244.705
66	241.86		66	246.775
67	243.851		67	248.854
68	245.792		68	250.891
69	247.751		69	252.951
70	249.639		70	254.984
71	251.524		71	256.979
72	253.357		72	258.975
73	255.258		73	260.974
74	257.139		74	262.898
75	259.017		75	264.775
76	260.842		76	266.616
77	262.615		77	268.393
78	264.375		78	270.206
79	266.223		79	271.836
80	267.996		80	273.583
81	269.726		81	275.33
82	271.473		82	277.05
83	273.243		83	278.752
84	274.934		84	280.441
85	276.67		85	282.116
86	278.408		86	283.808
87	280.118		87	285.471
88	281.838		88	287.132
89	283.502		89	288.781
90	285.178		90	290.431
91	286.862		91	292.076
92	288.528		92	293.695
93	290.122		93	295.3
94	291.799		94	296.924
95	293.435		95	298.539
96	295.046		96	300.103
97	296.655		97	301.68
98	298.283		98	303.279
99	299.891		99	304.82
100	301.488		100	306.383
101	303.037		101	307.954
103	306.172		103	311.026
105	309.308		105	314.079
107	312.421		107	317.085
109	315.509		109	320.059
111	318.508		111	322.977
113	321.567		113	325.902
115	324.582		115	328.814
117	327.534		117	331.673
119	330.435		119	334.496
121	333.315		121	337.321
123	336.155		123	340.114
125	339.055		125	342.89
127	341.879		127	345.625
129	344.718		129	348.339
131	347.524		131	351.027
133	350.257		133	353.681
135	353.029		135	356.306
137	355.8		137	358.94
139	358.487		139	361.526
141	361.153		141	364.119
143	363.846		143	366.676
145	366.499		145	369.243
147	369.13		147	371.778
149	371.774		149	374.304
151	374.334		151	376.799
153	376.952		153	379.274
155	379.549		155	381.763
157	380.871		157	385.339
159	382.424		159	387.779
161	384.927		161	390.215
163	386.465		163	391.601
165	387.941		165	393.97
167	389.185		167	395.325
169	391.125		171	396.455
171	392.044

## Sheet: Figure 7b
Figure 7b
Expt. #2			Expt. #5
Time (min)	Cumulative water imbibed (cm3)		Time (min)	Cumulative water imbibed (cm3)
0	0		0	0
1	15.95		1	14.525
2	28.557		2	27.729
3	39.169		3	39.447
4	47.761		4	48.171
5	55.138		5	56.129
6	61.309		6	63.217
7	68.084		7	69.674
8	73.852		8	75.607
9	79.245		9	81.178
10	84.057		10	86.471
11	88.928		11	91.476
12	93.547		12	96.242
13	97.958		13	100.763
14	102.205		14	105.13
15	106.292		15	109.4
16	110.072		16	113.54
17	113.878		17	117.489
18	117.55		18	121.359
19	121.167		19	125.1
20	124.624		20	128.751
21	128.053		21	132.315
22	131.464		22	135.787
23	134.791		23	139.195
24	138.039		24	142.507
25	141.245		25	145.725
26	144.442		26	148.837
27	147.552		27	151.965
28	150.623		28	154.974
29	153.66		29	158
30	156.674		30	160.958
31	159.622		31	163.883
32	162.573		32	166.746
33	165.476		33	169.506
34	168.341		34	172.257
35	171.187		35	174.943
36	173.99		36	177.611
37	176.782		37	180.257
38	179.551		38	182.896
39	182.242		39	185.455
40	185.593		40	187.986
41	188.259		41	190.46
42	190.893		42	192.898
43	193.505		43	195.331
44	196.119		44	197.758
45	198.68		45	200.145
46	201.209		46	202.465
47	203.736		47	204.771
48	206.222		48	207.096
49	208.703		49	209.353
50	211.182		50	211.55
51	213.625		51	213.732
52	216.067		52	215.915
53	218.467		53	218.062
54	220.858		54	220.224
55	223.232		55	222.379
56	225.594		56	224.467
57	227.984		57	226.6
58	230.319		58	228.697
59	232.628		59	230.805
60	234.948		60	232.815
61	237.273		61	234.876
62	239.539		62	236.879
63	241.792		63	238.847
64	244.062		64	240.775
65	246.148		65	242.709
66	248.165		66	244.619
67	250.156		67	246.577
68	252.13		68	248.542
69	254.084		69	250.479
70	256.068		70	252.362
71	258.051		71	254.228
72	259.885		72	256.061
73	261.731		73	257.862
74	261.882		74	259.719
75	263.385		75	261.507
76	264.575		77	262.685
77	265.584		78	264.157
78	266.617		79	265.229
79	267.415		81	266.872
80	268.182		82	267.696
81	269.043		84	268.871
82	269.705		86	269.966
83	270.389		88	270.996
84	271.01		90	271.939
85	271.703		92	272.756
86	272.274		95	273.867
87	272.859		97	274.671
88	273.489		100	275.729
89	274.068		104	276.89
90	274.475		107	277.767
91	275.046		110	278.844
92	275.594		114	279.955
94	276.52		117	280.587
96	277.452		122	281.636
98	278.449		127	282.787
100	279.314		133	283.876
103	280.454		139	284.922
105	281.244		146	285.999
107	281.981		152	286.852
111	283.299		160	287.944
114	284.459		167	288.818
116	285.149		173	289.836
118	285.861		177	290.411
120	286.525		184	291.674
124	287.657		191	292.831
127	288.662		198	293.909
129	289.267		206	294.971
131	289.878		213	295.983
133	290.485		217	296.541
137	291.478		224	297.558
140	292.424		231	298.561
151	295.463		238	299.554
162	298.333		249	300.917
170	300.371		257	301.773
175	301.647		264	302.659
181	302.862		275	303.89
186	304.006		282	304.727
192	305.134		289	305.579
197	306.235		300	306.824
203	307.382		308	307.668
208	308.476		318	308.812
214	309.53		329	309.872
219	310.555		340	310.919
225	311.638		348	311.628
230	312.631		358	312.739
236	313.622		369	313.817
241	314.628		380	314.821
247	315.583		391	315.855
252	316.585		402	316.812
258	317.555		413	317.735
263	318.495		424	318.684
269	319.392		438	319.864
274	320.272		453	320.976
279	321.105		464	321.83
285	322.022		478	322.947
290	322.808		489	323.9
296	323.639		504	324.93
301	324.418		518	325.986
307	325.238		529	326.839
312	326.01		544	327.896
321	327.108		558	328.929
329	328.274		573	329.93
337	329.441		588	330.902
345	330.575		602	331.971
353	331.646		617	332.887
362	332.664		631	333.863
370	333.649		646	334.862
375	334.451		664	335.952
386	335.727		678	336.838
397	337.1		697	337.841
408	338.385		718	338.921
419	339.665		740	339.96
430	340.908		762	340.912
441	342.177		780	341.813
452	343.357		813	342.997
463	344.568		849	343.954
474	345.744		878	344.582
485	346.915
496	348.014
507	349.045
518	350.152
529	351.12
542	352.332
553	353.375
564	354.271
575	355.152
586	356.116
603	357.277
619	358.397
641	359.761
660	360.934
685	362.107
723	363.367
753	364.319
795	365.494
863	366.515
